# Supplementary material for: Bioinspired photo-crosslinkable self-assembling peptides with pH-switchable “on–off” luminescence
Source: Royal Society of Chemistry journal article supplement (doi:10.1039/d1na00688f), 2021-11-22
Supplement: d1na00688f1.pdf [file d1na00688f1.pdf]

## Supplementary Information for

# Bioinspired Photo-crosslinkable Self-assembling Peptide with pH-Switchable “On-Off” Luminescence

Raffaele Pugliese<sup>1,4\*</sup>, Monica Montuori<sup>3</sup>, Fabrizio Gelain<sup>1,2,\*</sup>

<sup>1</sup>Tissue Engineering Unit, Institute for Stem Cell Biology, Regenerative Medicine and Innovative Therapies- ISBReMIT, Fondazione IRCCS Casa Sollievo della Sofferenza, 71013 San Giovanni Rotondo (FG), Italy

<sup>2</sup>Center for Nanomedicine and Tissue Engineering (CNTE), ASST Grande Ospedale Metropolitano Niguarda, 20162 Milan, Italy

<sup>3</sup>Biotechnology and Biosciences Department, University of Milan-Bicocca, 20162 Milan, Italy

<sup>4</sup>NeMO Lab, ASST Grande Ospedale Metropolitano Niguarda, 20162 Milan, Italy

\*Corresponding author at: [f.gelain@css-mendel.it](mailto:f.gelain@css-mendel.it) (F.G.), [raffaele.pugliese@nemolab.it](mailto:raffaele.pugliese@nemolab.it) (R.P.)

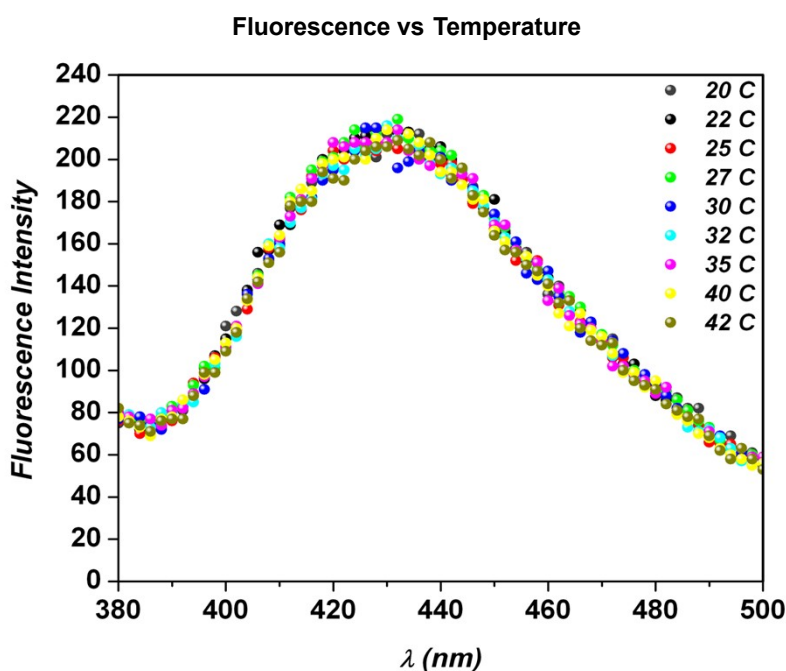

**Figure S1.** Temperature-dependent fluorescence intensity of peptide moiety after photo-cross-linking. No fluorescent decay was observed in the range of 20–42°C

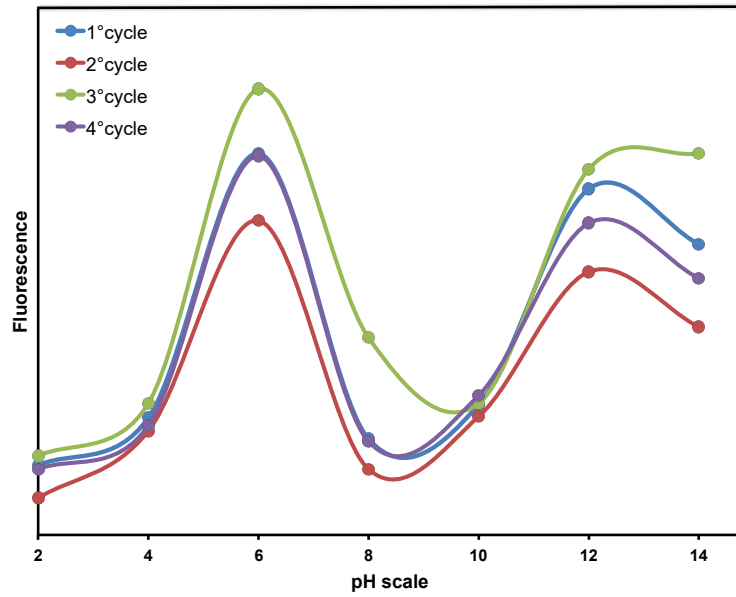

**Figure S2.** Reversibility of “on-off” luminescence of photo-cross-linked 33Y SAP subjected to multiple cycles of pH shifts.

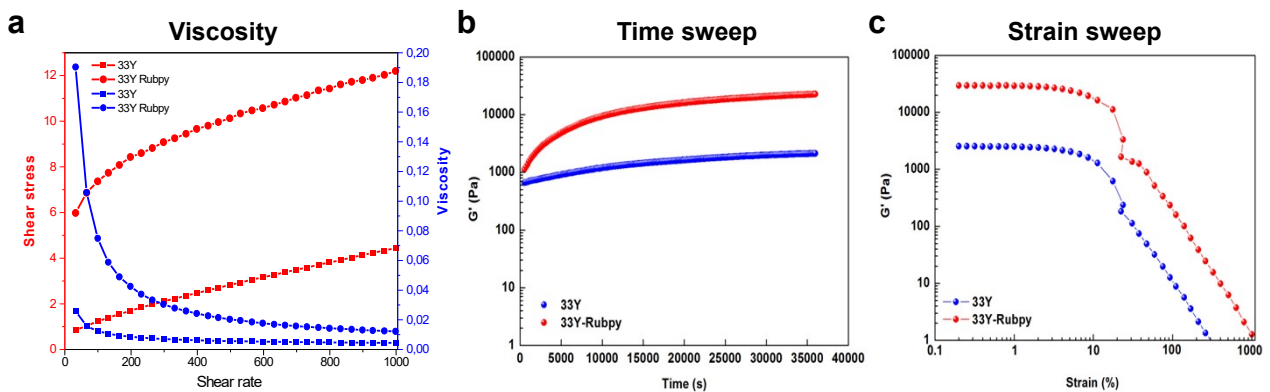

**Figure S3.** Mechanical properties of 33Y and 33Y photo-cross-linked peptides. (a) Viscosity measurements at increasing shear rate of both peptides, showing non-Newtonian shear-thinning behavior with a decrease of viscosity as the shear-rate increase. (b) Kinetics of self-assembling and photo-cross-linking of peptide solutions monitored via a 10 h time-sweep test. For both peptides,  $G'$  trends showed typical hydrogel-like profiles, suggesting that the ruthenium photo-cross-linking does not hamper the assembly of LDLK12 backbone. (c) Strain failure tests within the linear viscoelasticity region, showing that breakage occurred for both peptides at  $\sim 12\%$  of strain.

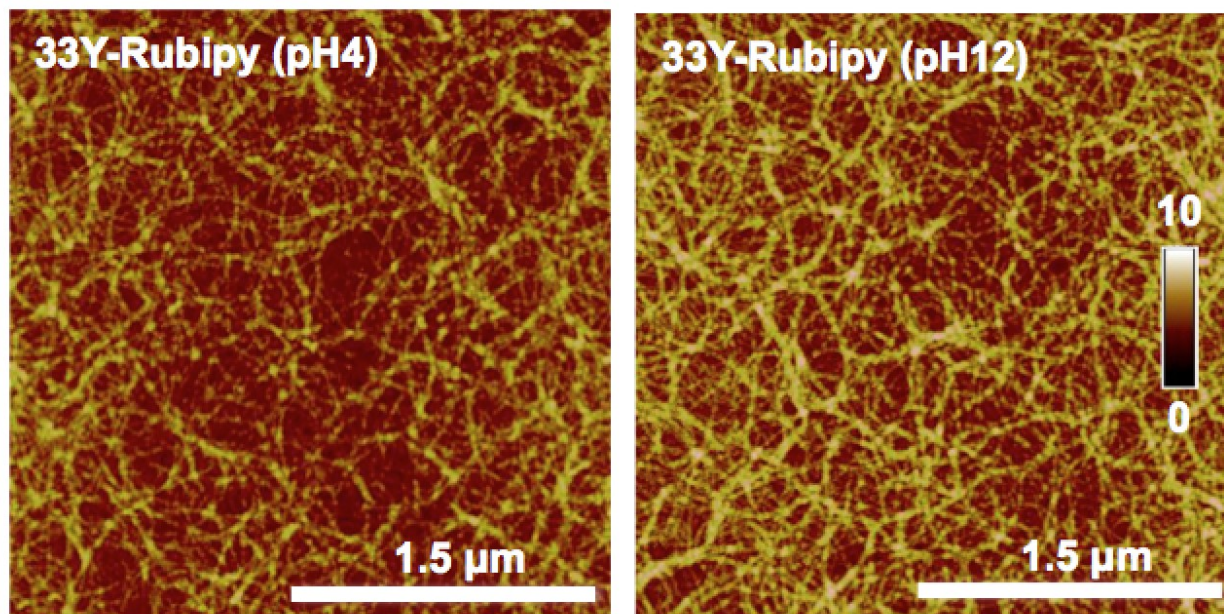

**Figure S4.** AFM images of 33Y photo-cross-linked peptides at pH4 and pH12. The nanofibrous structure of the photo-cross-linked SAP is preserved.
